# Supplementary material for: Ionic liquids strongly affect the interaction of bacteria with magnesium oxide and silica nanoparticles
Source: RSC Adv. 2019 Sep 12;9(49):28724–34. doi: 10.1039/c9ra05110d (PMC9071200; doi:10.1039/c9ra05110d)
Supplement: RA-009-C9RA05110D-s001 [file RA-009-C9RA05110D-s001.pdf]

## Supplementary materials

Table S1. The theophylline-based ILs and imidazolium-based ILs used in the studies.

| Compound | Name<br>Molecular weight [g/mol]                         | Structure |
|----------|----------------------------------------------------------|-----------|
| C8T      | Octyltrimethylammonium theophyllinate<br>MW: 351.49      |           |
| C10T     | Decyltrimethylammonium theophyllinate<br>MW: 379.54      |           |
| C12T     | Dodecyltrimethylammonium theophyllinate<br>MW: 407.59    |           |
| C14T     | Tetradecyltrimethylammonium theophyllinate<br>MW: 435.65 |           |
| C16T     | Hexadecyltrimethylammonium theophyllinate<br>MW: 463.70  |           |
| C18T     | Octadecyltrimethylammonium theophyllinate<br>MW: 491.75  |           |
| C6Im     | 1-hexyl-3-methylimidazolium chloride<br>MW: 202.72       |           |
| C8Im     | 1-methyl-3-octylimidazolium chloride<br>MW: 230.78       |           |
| C10Im    | 1-decyl-3-methylimidazolium chloride<br>MW: 258.83       |           |
| DC10Im   | 1,3-didecyl-2-methylimidazolium chloride<br>MW: 399.10   |           |

Table S2. BET and PZC analyses of studied nanoparticles

|                              | MgO nanoparticles                               | SiO <sub>2</sub> nanoparticles                   |
|------------------------------|-------------------------------------------------|--------------------------------------------------|
| BET Surface Area             | 46.6530 ± 0.3040 m <sup>2</sup> g <sup>-1</sup> | 154.8858 ± 1.5541 m <sup>2</sup> g <sup>-1</sup> |
| Correlation Coefficient      | 0.9998729                                       | 0.9998509                                        |
| t-Plot Micropore Area        | 6.4513 m <sup>2</sup> g <sup>-1</sup>           | 63.0977 m <sup>2</sup> g <sup>-1</sup>           |
| t-Plot External Surface Area | 40.2017 m <sup>2</sup> g <sup>-1</sup>          | 91.7880 m <sup>2</sup> g <sup>-1</sup>           |
| Point of Zero Charge         | 11.5                                            | 3.5                                              |
